# Supplementary material for: Chemosensory Event-Related Potentials in Response to Nasal Propylene Glycol Stimulation
Source: PubMed Central journal article supplement (PMC6435593; doi:10.3389/fnhum.2019.00099), 2019-03-20
Supplement: Data_Sheet_1.pdf [file Data_Sheet_1.pdf]

1 **Chemosensory event-related potentials in response to nasal**  
2 **propylene glycol stimulation**

3

4 Mohammad Sirous<sup>1\*</sup>, Nico Sinning<sup>1\*</sup>, Till R. Schneider<sup>1</sup>, Uwe Frieze<sup>1,3</sup>, Jürgen  
5 Lorenz<sup>2</sup>, Andreas K. Engel<sup>1</sup>

6

7

8 <sup>1</sup> Department of Neurophysiology and Pathophysiology, University Medical Center  
9 Hamburg-Eppendorf, 20246 Hamburg, Germany

10

11 <sup>2</sup> Faculty of Life Science, Laboratory of Human Biology and Physiology, Applied  
12 Science University, 21033 Hamburg, Germany

13

14 <sup>3</sup> Faculty of Life Sciences, MSH Medical School Hamburg, 20457 Hamburg,  
15 Germany

16

17  
18 \* Both authors contributed equally to this manuscript

19

20

21

22

23

24

25

26

27

28

29 Correspondence should be addressed to:

30 Dr. Mohammad Sirous

31 Dept. of Neurophysiology and Pathophysiology

32 University Medical Center Hamburg-Eppendorf

33 20246 Hamburg

34 Dr.mohammadsirous@gmail.com



36 **Supplementary material**

37

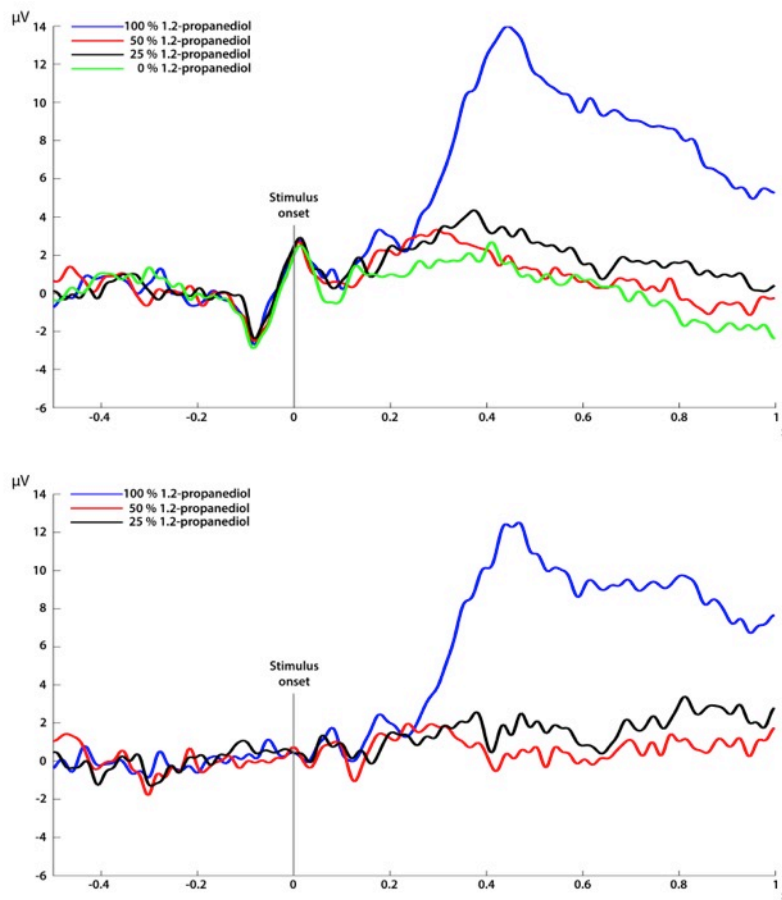

**Supplementary Figure 1:** Baseline corrected (-500 – 0 ms) evoked potentials. The x-axis shows the time in ms and the y-axis displays the power in  $\mu V$ .

Top: CSERPs of all conditions at electrode Cz. Bottom: CSERPs of the conditions containing propylene glycol after subtraction of the control condition (electrode Cz). The ERPs in the top panel include a visual evoked potential during the stimulus onset, which was produced by the stimulus cue. Subtraction of the control condition reveals the pure response to the chemosensory stimulus (bottom panel).

38

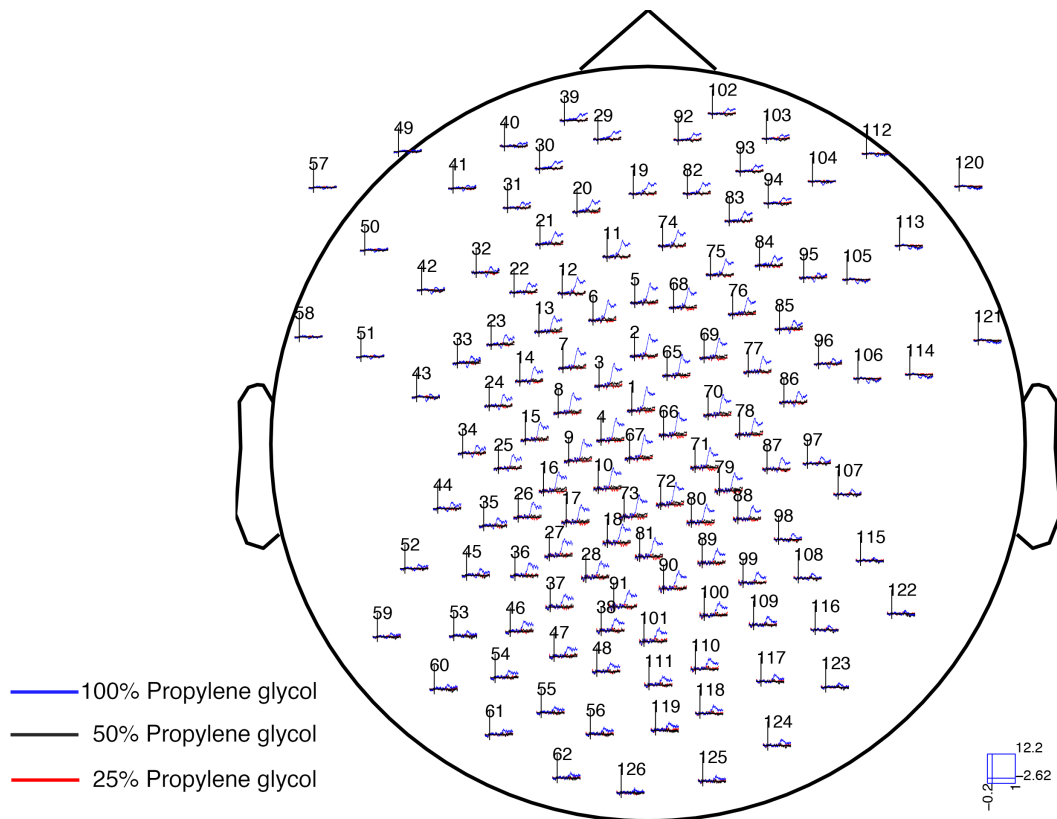

**Supplementary Figure 2:** Grandaverage CSERPs at all electrodes (baseline corrected (-500 – 0ms)). The x-axis shows the time in ms and the y-axis displays the power in  $\mu V$ . All conditions containing propylene glycol are plotted after subtraction of the control condition.

39  
40

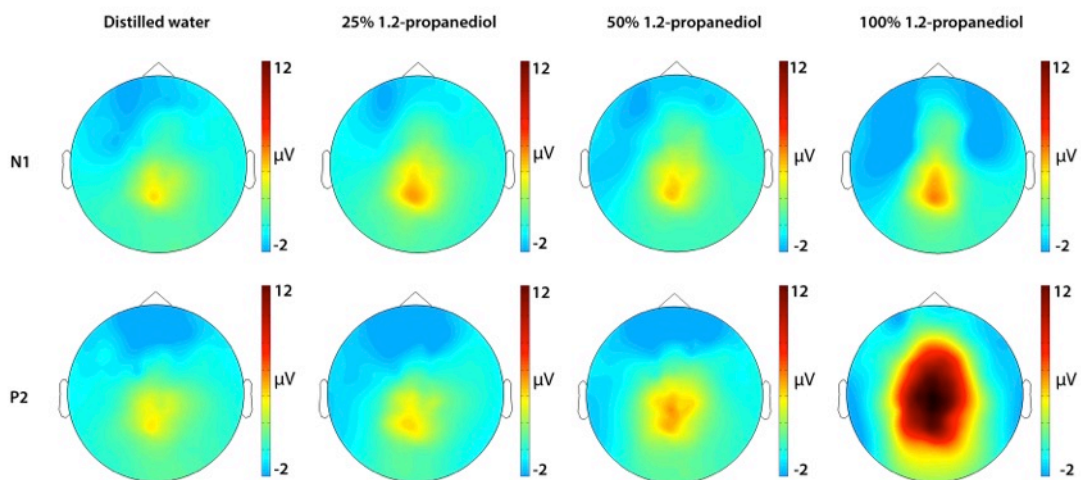

**Supplementary Figure 3:** Topography of EEG responses at N1 (240ms) and P2 (450ms) in  $\mu V$  for all conditions.

41  
42

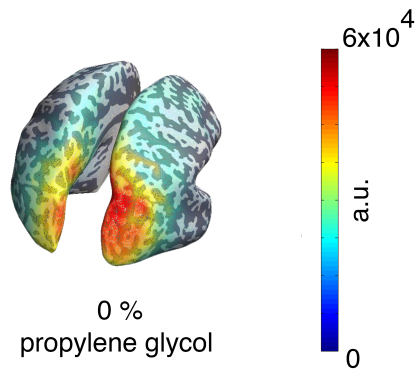

**Supplementary Figure 4:** Source analysis of the visual evoked potential (125 ms after colour change, see supplementary figure 1) in the control condition by means of eLORETA. The analysis reveals occipital activation. The visual response seems to be related to the colour change of the circle before chemosensory stimulus onset, which slightly changed the luminance.

43
